# Supplementary material for: Glutamatergic and GABAergic Metabolism in Mouse Brain under Chronic Nicotine Exposure: Implications for Addiction
Source: PubMed Central journal article supplement (PMC3405019; doi:10.1371/journal.pone.0041824), 2012-07-25
Supplement: pone.0041824.s001.pdf [file pone.0041824.s001.pdf]

**Table S1:**  $^{13}\text{C}$  Concentration of cerebral amino acids from  $[\text{U-}^{13}\text{C}_6]\text{glucose}$  and  $[\text{2-}^{13}\text{C}]\text{acetate}$ 

| Brain Region | Treatment         | GluC4       |             | GABAC2     |            | GlnC4       |            |
|--------------|-------------------|-------------|-------------|------------|------------|-------------|------------|
|              |                   | Glucose     | Acetate     | Glucose    | Acetate    | Glucose     | Acetate    |
| Cortex       | Control (n=6)     | 3.19±0.11   | 0.64±0.02   | 0.34±0.02  | 0.08±0.01  | 0.48±0.03   | 0.46±0.03  |
|              | Nic (0.5mg) (n=6) | 3.57±0.16   | 0.76±0.02** | 0.39±0.02  | 0.10±0.00  | 0.55±0.03   | 0.52±0.05  |
|              | Nic (2.0mg) (n=6) | 4.02±0.17** | 0.67±0.03   | 0.40±0.02* | 0.07±0.01  | 0.67±0.04** | 0.50±0.02  |
| Subcortex    | Control (n=6)     | 2.59±0.11   | 0.56±0.03   | 0.50±0.02  | 0.11±0.01  | 0.47±0.01   | 0.50±0.03  |
|              | Nic (0.5mg) (n=6) | 2.82±0.06   | 0.63±0.02*  | 0.52±0.03  | 0.12±0.01  | 0.52±0.04   | 0.55±0.04  |
|              | Nic (2.0mg) (n=6) | 3.35±0.17** | 0.61±0.03   | 0.56±0.04  | 0.12±0.01  | 0.61±0.05*  | 0.63±0.04* |
| Cerebellum   | Control (n=6)     | 2.41±0.09   | 0.39±0.02   | 0.47±0.04  | 0.07±0.01  | 0.42±0.03   | 0.48±0.02  |
|              | Nic (0.5mg) (n=6) | 2.70±0.08*  | 0.42±0.04   | 0.53±0.02  | 0.09±0.01* | 0.53±0.03*  | 0.47±0.05  |
|              | Nic (2.0mg) (n=6) | 3.18±0.17** | 0.42±0.02   | 0.54±0.03  | 0.08±0.01  | 0.61±0.09   | 0.60±0.05* |

The concentration of  $^{13}\text{C}$  labelled amino acids was calculated by multiplying the normalised deconvolved enrichment with the total concentration. Values represent mean±SEM. \* $p < 0.05$ , \*\* $p < 0.01$  indicate significance of differences when compared to respective control.
